# Supplementary material for: Home-based virtual reality-enhanced upper limb training system in children with brain injury: a randomized controlled trial
Source: PubMed Central journal article supplement (PMC10233002; doi:10.3389/fped.2023.1131573), 2023-05-18
Supplement: Datasheet1.pdf [file Datasheet1.pdf]

## *Supplementary Material*

**Supplementary Table 1.** Training information

|                        | Training amount during 6wks (min) |                          |                                     | Training Movement    |                 |                    |                    |                       |
|------------------------|-----------------------------------|--------------------------|-------------------------------------|----------------------|-----------------|--------------------|--------------------|-----------------------|
|                        | Number of training sessions       | Total training time, min | Mean training time per session, min | Forearm pron/sup (%) | Wrist UD/RD (%) | Wrist UD/RD-EG (%) | Wrist Flex/Ext (%) | Wrist Flex/Ext-EG (%) |
| Subject01              | 41                                | 1368                     | 33.4                                | 13.4                 | 10.8            | 7.5                | 27.9               | 40.3                  |
| Subject02              | 37                                | 1175                     | 31.8                                | 13.3                 | 12.3            | 11.1               | 25.6               | 37.6                  |
| Subject03              | 33                                | 990                      | 30.0                                | 12.1                 | 9.8             | 8.0                | 37.8               | 32.3                  |
| Subject04              | 29                                | 978                      | 33.7                                | 15.8                 | 8.6             | 8.4                | 31.0               | 36.2                  |
| Subject05              | 31                                | 973                      | 31.4                                | 15.8                 | 9.5             | 9.8                | 31.1               | 33.8                  |
| Subject06              | 31                                | 930                      | 30.0                                | 12.5                 | 9.7             | 12.1               | 23.8               | 41.9                  |
| Subject07              | 29                                | 884                      | 30.5                                | 16.6                 | 13.8            | 7.0                | 23.9               | 38.7                  |
| Subject08              | 27                                | 863                      | 32.0                                | 8.6                  | 13.1            | 10.8               | 30.0               | 37.6                  |
| Subject09              | 35                                | 850                      | 24.3                                | 15.0                 | 7.8             | 10.9               | 25.1               | 41.1                  |
| Subject10              | 27                                | 803                      | 29.7                                | 12.6                 | 10.1            | 9.3                | 34.0               | 34.0                  |
| Subject11              | 24                                | 744                      | 31.0                                | 16.5                 | 4.6             | 3.4                | 64.0               | 11.5                  |
| Subject12              | 33                                | 679                      | 20.6                                | 17.1                 | 9.4             | 8.8                | 30.7               | 35.0                  |
| Subject13              | 30                                | 627                      | 20.9                                | 30.1                 | 13.1            | 12.7               | 23.8               | 20.3                  |
| Subject14              | 28                                | 618                      | 22.1                                | 24.0                 | 6.3             | 12.3               | 21.6               | 35.8                  |
| Subject15              | 12                                | 337                      | 28.1                                | 18.6                 | 5.5             | 9.9                | 34.0               | 32.0                  |
| Mean (1-15)            | 29.8 (6.5)                        | 854.6 (245.2)            | 28.6 (4.4)                          | 16.0 (5.2)           | 9.7 (2.8)       | 9.5 (2.4)          | 30.7 (9.7)         | 33.9 (8.1)            |
| Excluded from analysis |                                   |                          |                                     |                      |                 |                    |                    |                       |
| Subject16              | 5                                 | 112                      | 22.5                                | 14.8                 | 3.4             | 2.7                | 33.3               | 45.9                  |
| Subject17              | 5                                 | 87                       | 17.4                                | 34.1                 | 11.5            | 4.8                | 24.9               | 24.9                  |

UD, ulnar deviation; RD, radial deviation; EG, eliminated gravity

**Supplementary Table 2.** Motion analysis at baseline, after intervention, and at 6 weeks follow-up

| Variable                          | Task phase | Group   | T0          | T1          | T2          | Mann-Whitney test |                |                | Friedman Test | Wilcoxon signed rank test |       |
|-----------------------------------|------------|---------|-------------|-------------|-------------|-------------------|----------------|----------------|---------------|---------------------------|-------|
|                                   |            |         |             |             |             | T0                | $\Delta$ T0-T1 | $\Delta$ T0-T2 | T0-T2         | T0-T1                     | T0-T2 |
|                                   |            |         |             |             |             | mean (SD)         | mean (SD)      | mean (SD)      | P             | P                         | P     |
| <b>Temporal-spatial Parameter</b> |            |         |             |             |             |                   |                |                |               |                           |       |
| Movement Time                     | Phase 1    | VR      | 1.46 (0.59) | 1.38 (0.56) | 1.64 (0.75) | 0.382             | 0.908          | 0.908          | 0.819         | 0.733                     | 0.532 |
|                                   |            | Control | 1.37 (0.68) | 1.34 (0.69) | 1.55 (0.96) |                   |                |                |               |                           |       |
|                                   | Phase 2    | VR      | 1.97 (1.24) | 1.97 (1.21) | 1.52 (0.84) | 0.934             | 0.961          | 0.019*         | 0.138         | 0.510                     | 0.061 |
|                                   |            | Control | 1.72 (0.80) | 1.89 (1.29) | 1.98 (1.13) |                   |                |                |               |                           |       |
|                                   | Phase 3    | VR      | 1.64 (0.83) | 1.57 (0.67) | 1.46 (0.86) | 0.934             | 0.705          | 0.214          | 0.247         | 0.733                     | 0.307 |
|                                   |            | Control | 1.73 (1.11) | 1.66 (1.30) | 1.91 (1.83) |                   |                |                |               |                           |       |
|                                   | Phase 4    | VR      | 1.28 (0.58) | 1.49 (0.50) | 1.70 (0.93) | 0.382             | 0.382          | 0.438          | 0.280         | 0.047                     | 0.078 |
|                                   |            | Control | 1.59 (0.85) | 1.66 (1.22) | 1.61 (0.70) |                   |                |                |               |                           |       |
| Index of Curvature                | Phase 1    | VR      | 1.42 (0.30) | 1.49 (0.43) | 1.34 (0.65) | 0.633             | 0.657          | >0.999         | 0.627         | 0.776                     | 0.865 |
|                                   |            | Control | 1.40 (0.36) | 1.34 (0.22) | 1.43 (0.35) |                   |                |                |               |                           |       |
|                                   | Phase 2    | VR      | 1.26 (0.21) | 1.26 (0.32) | 1.11 (0.58) | 0.107             | 0.080          | 0.542          | 0.807         | 0.638                     | 0.427 |
|                                   |            | Control | 1.18 (0.24) | 1.21 (0.30) | 1.16 (0.10) |                   |                |                |               |                           |       |
|                                   | Phase 3    | VR      | 1.30 (0.32) | 1.20 (0.10) | 1.24 (0.97) | 0.587             | 0.856          | 0.755          | 0.420         | 0.820                     | 0.334 |
|                                   |            | Control | 1.33 (0.53) | 1.23 (0.34) | 1.20 (0.24) |                   |                |                |               |                           |       |
|                                   | Phase 4    | VR      | 1.52 (0.63) | 1.49 (0.37) | 1.65 (1.13) | 0.856             | 0.831          | 0.542          | 0.189         | 0.733                     | 0.570 |
|                                   |            | Control | 1.61 (0.81) | 1.53 (0.47) | 1.58 (0.47) |                   |                |                |               |                           |       |

VR, virtual reality; Values are Least square mean (standard error)

\* p &lt;0.05 by linear mixed model

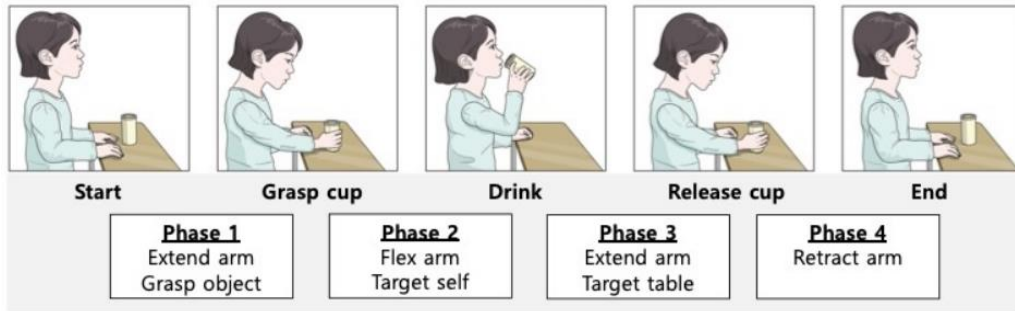

**Supplementary Figure 1.** Segmentation of motion capture data of the reach-and-grasp task
